# Supplementary material for: Metallic PtC monolayer as a promising hydrogen evolution electrocatalyst
Source: Royal Society of Chemistry journal article supplement (doi:10.1039/d4cp04355c), 2025-01-01
Supplement: d4cp04355c1.pdf [file d4cp04355c1.pdf]

## Supporting Information

### **Metallic PtC monolayer as a promising hydrogen evolution electrocatalyst**

Huan Lou<sup>1\*</sup>, and Chi Ma<sup>2</sup>

*<sup>1</sup>Department of Applied Physics, School of Science, Jiangsu University of Science and Technology, Zhenjiang 212100, China*

*<sup>2</sup>Department of Optoelectronic Information of Science and Engineering, School of Science, Jiangsu University of Science and Technology, Zhenjiang 212100, China*

Corresponding Author

\*E-mail: louhuan@just.edu.cn

| <b>Index</b>                                                                                                                              | <b>Page</b> |
|-------------------------------------------------------------------------------------------------------------------------------------------|-------------|
| 1. Computational details·····                                                                                                             | 5           |
| 2. selected low-energy configurations for each monolayer ratio·····                                                                       | 6           |
| 3. Phonon dispersive curves of the PtC <sub>x</sub> monolayers·····                                                                       | 6           |
| 4. Thermal stability of the PtC <sub>x</sub> monolayers·····                                                                              | 7           |
| 5. Band structures of the PtC <sub>x</sub> monolayers·····                                                                                | 7           |
| 6. ELF of the PtC <sub>x</sub> monolayers ·····                                                                                           | 8           |
| 7. Calculated differential Gibbs free energies as a function of H coverage on T <sub>C3</sub> site of the PtC <sub>4</sub> monolayer····· | 8           |
| 8. Calculated $i_0$ and $\Delta G_{H^*}$ with increasing pH values of the PtC <sub>x</sub> monolayer·····                                 | 9           |
| 9. Free energy of Hydrogen adsorption as a function of the pH value·····                                                                  | 9           |
| 10. $d-\Delta G_{H^*}$ as a function of the pH value·····                                                                                 | 10          |
| 11. Exchange current density as a function of the pH value·····                                                                           | 10          |
| 12. Exchange current density as a function of the pH value with various H coverage·····                                                   | 11          |
| 13. Structural information of the PtC <sub>x</sub> monolayers·····                                                                        | 12          |
| 14. Cohesive energy of the PtC <sub>x</sub> monolayers·····                                                                               | 12          |
| 15. Mulliken charge analysis of the PtC <sub>x</sub> monolayers·····                                                                      | 13          |
| 16. $\Delta G_{H^*}$ values of the PtC <sub>x</sub> monolayers·····                                                                       | 13          |
| 17. References·····                                                                                                                       | 14          |

## Computational Details

The particle swarm optimization (PSO) method within the evolutionary algorithm implemented in the Crystal structure AnaLYsis by Particle Swarm Optimization (CALYPSO) code<sup>1,2</sup> was employed to find the lowest energy structures of the PtC<sub>x</sub> ( $x = 1-4$ ) monolayers. Unit cells containing 1, 2, and 4 formula units (f.u.) were considered. In the first step, random structures with certain symmetry are constructed in which atomic coordinates are generated by the crystallographic symmetry operations. Local optimizations using the VASP code<sup>3</sup> were done with the conjugate gradients method and stopped when Gibbs free energy changes became smaller than  $1 \times 10^{-5}$  eV per cell. After processing the first-generation structures, 60% of them with lower Gibbs free energies are selected to construct the next generation structures by Particle Swarm Optimization (PSO). 40% of the structures in the new generation are randomly generated. A structure fingerprinting technique of bond characterization matrix is applied to the generated structures, so that identical structures are strictly forbidden. These procedures significantly enhance the diversity of the structures, which is crucial for structural global search efficiency. In most cases, structural searching simulations for each calculation were stopped after generating 1000 ~ 1200 structures (*e.g.* about 20-30 generations).

The local structural relaxations and electronic properties calculations were performed in the framework of the density functional theory (DFT)<sup>4</sup> within the generalized gradient approximation (GGA)<sup>5</sup> as implemented in the VASP code. The cut off energy is 500 eV for plane-wave expansions, the total energy and force convergence precision are set to  $10^{-5}$  eV and  $10^{-2}$  eV/Å. Moreover, Van der Waals interactions (DFT-D2) is employed.<sup>6</sup> The valence orbitals of Pt and C atoms are  $6s^15d^9$  and  $2s^22p^2$ , respectively.

First-principles molecular dynamics (MD)<sup>7</sup> simulations for a large supercell were performed at different temperatures of 300 K. The supercells adopt  $1 \times 3 \times 3$  for PtC with  $P2_1/m$  symmetry,  $3 \times 1 \times 1$  for PtC<sub>2</sub> with  $Pbam$  symmetry,  $5 \times 1 \times 1$  for PtC<sub>3</sub> with  $Pma2$  symmetry, and  $1 \times 3 \times 1$  for PtC<sub>4</sub> with  $Pbam$  symmetry. MD simulation in NVT ensemble lasted for 10 ps with a time step of 1.0 fs. The temperature was controlled by using the Nosé-Hoover method.

The HER performance of the PtC<sub>x</sub> ( $x = 1-4$ ) monolayers are studied by the differential Gibbs free energy of hydrogen adsorption,<sup>8</sup> *i.e.*  $\Delta G_{H^*} = \Delta E_H + \Delta E_{ZPE} - T\Delta S_H$ . The adsorption energy types of H

are divided into chemisorption and average energies, of which are defined as  $d-\Delta E_H = E_{PtC_x+nH} - E_{PtC_x+(n-1)H} - \frac{1}{2}E_{H_2}$ , and  $a-\Delta E_H = (E_{PtC_x+nH} - E_{PtC_x} - \frac{1}{2}nE_{H_2})/n$ , respectively.  $E(PtC_x+nH)$  and  $E_{H_2}$  are the total energies of  $PtC_x$  adsorbing  $n$  H and a  $H_2$ , respectively.  $\Delta E_{ZPE}$  and  $\Delta S_H$  are zero-point energy difference and entropy difference between adsorbed H and  $H_2$ ,  $T$  is room temperature, among  $\Delta E_{ZPE} - T\Delta S_H$  is given 0.24 eV.<sup>8</sup> Therefore, there are two HER processes, *i.e.* individual process describes the production of  $H_2$  molecule one by one ( $d-\Delta G_{H^*}$ ), and average process shows all H atoms are simultaneously converted to  $H_2$  ( $a-\Delta G_{H^*}$ ) on the basal surface. The theoretical exchange current ( $i_0$ ) is calculated as<sup>9</sup>

$$i_0 = \begin{cases} \frac{-ek_0}{1 + \exp\left[-\frac{\Delta G_{H^*}}{k_b T}\right]}, & \Delta G_{H^*} \leq 0 \\ \frac{-ek_0}{1 + \exp\left[\frac{\Delta G_{H^*}}{k_b T}\right]}, & \Delta G_{H^*} \geq 0 \end{cases}$$

where the rate constant  $k_0$  is presumed 1.

## Cohesive energy

Cohesive energy is widely used to ascertain the feasibility for experimental synthesis of the predicted 2D materials. Here, the cohesive energy  $E_{coh}$  is calculated based on the equation of  $E_{coh} = (E_{Pt} + x \times E_C - E_{PtC_x})/(1 + x)$ , where  $E_{Pt}$  and  $E_C$  for Pt and C atoms are the enthalpy values of each single atom placed in a  $10 \times 10 \times 10$  Å box.  $E_{PtC_x}$  is the energy of 2D  $PtC_x$  unit cell.

## Dissolution potential $U_{diss}$

The electrochemical stability of the  $PtC_x$  monolayers is assessed by the dissolution potential  $U_{diss}$ , which are defined as

$$E_f = (E_{PtC_x} - E_{Pt} - E_C)/2$$

$$U_{diss} = U_{diss}^0(\text{metal, bulk}) - E_f/ne$$

where  $E_f$  is formation energy,  $E_{PtC_x}$ ,  $E_{Pt}$ , and  $E_C$  represent the energies of the  $PtC_x$  monolayer, the Pt and C atoms in bulk structure, respectively.  $U_{diss}^0(\text{metal, bulk})$  and  $n$  stand for the standard dissolution potential of bulk metal and the number of electrons involved in the dissolution, respectively.

## Effect of pH on HER performance

$$\Delta G(\text{pH}) = k_B T \ln(10) \times \text{pH}$$

$\Delta G(\text{pH})$  is an additional barrier for the adsorption of H atoms and is given by the pH value of the electrolyte.  $\Delta G(\text{pH})$  value equals to 0 eV when  $\text{pH} = 0$  and increases when the corresponding electrolyte is neutral or basic.

## Supporting Figures

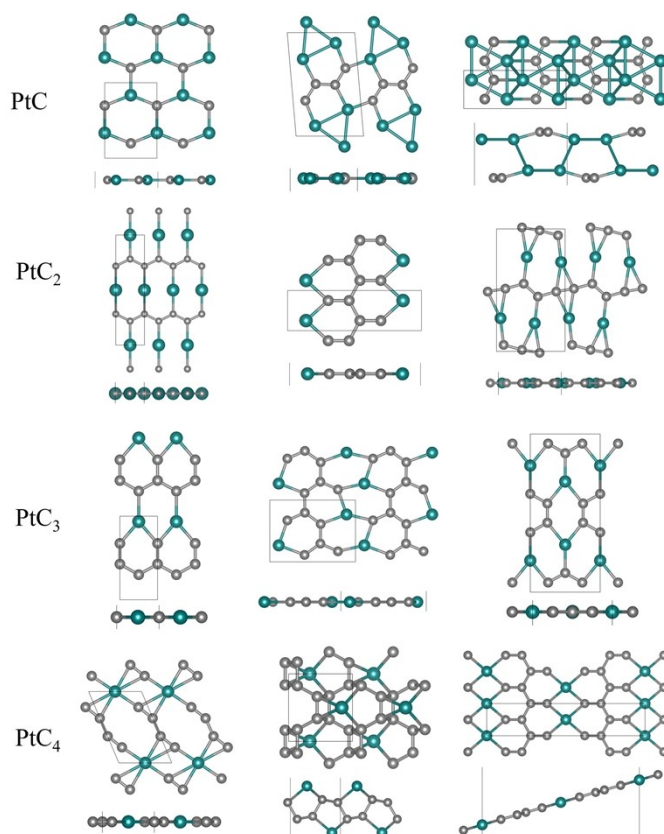

**Figure S1.** Top and side views of selected low-energy configurations for each monolayer ratio. The indigo and gray balls represent Pt and C atoms, respectively.

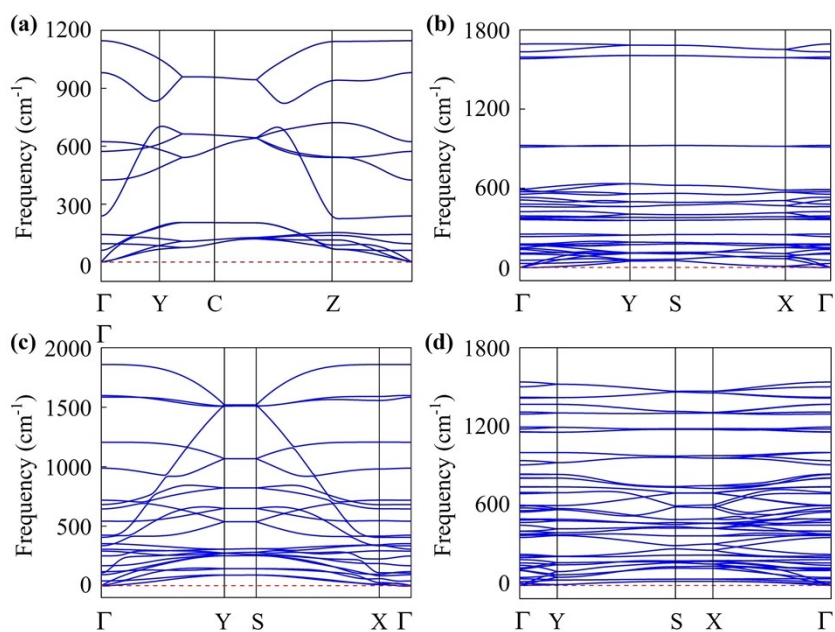

**Figure S2.** Phonon dispersive curves of the (a) PtC, (b) PtC<sub>2</sub>, (c) PtC<sub>3</sub>, and (d) PtC<sub>4</sub> monolayers. The phonon maximum frequencies of four monolayers are 1146, 1693, 1859, and 1540 cm<sup>-1</sup>, respectively.

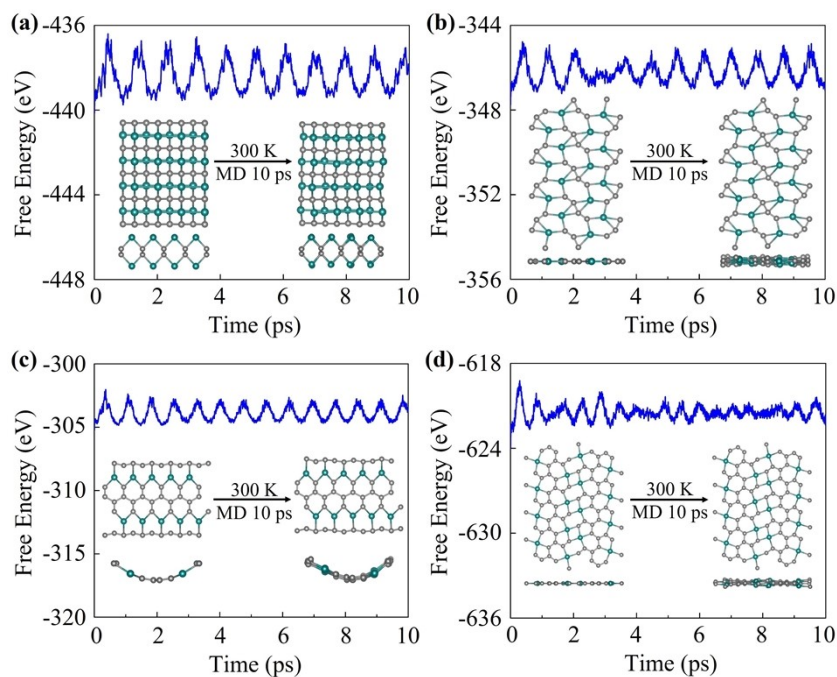

**Figure S3.** Snapshots of the final frame of the  $\text{PtC}_x$  monolayers at time of 10 ps during AIMD simulations under the temperatures of 300 K, (a) PtC, (b)  $\text{PtC}_2$ , (c)  $\text{PtC}_3$ , and (d)  $\text{PtC}_4$  monolayers. The indigo and gray balls represent Pt and C atoms, respectively.

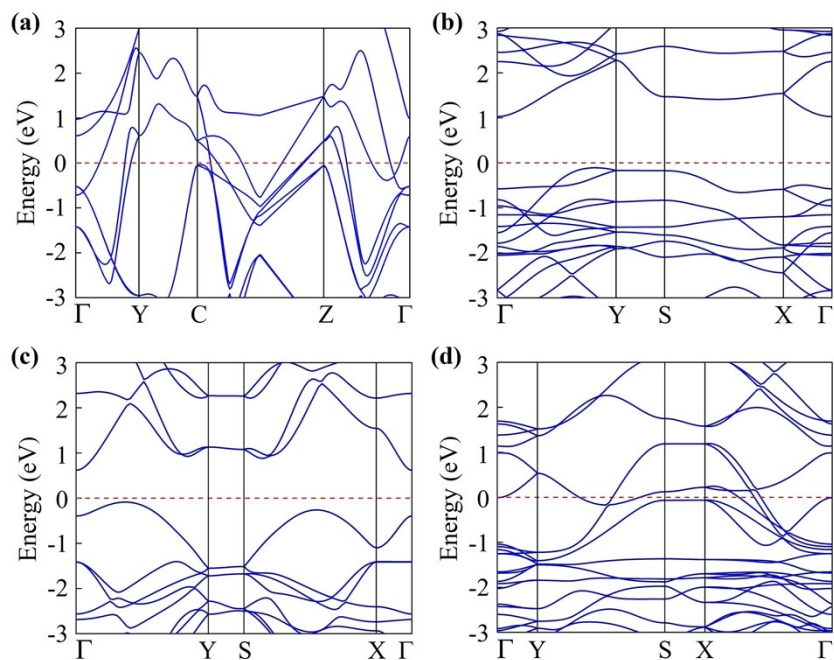

**Figure S4.** Band structures of the (a) PtC, (b)  $\text{PtC}_2$ , (c)  $\text{PtC}_3$ , and (d)  $\text{PtC}_4$  monolayers. The red solid lines represent the Fermi level.

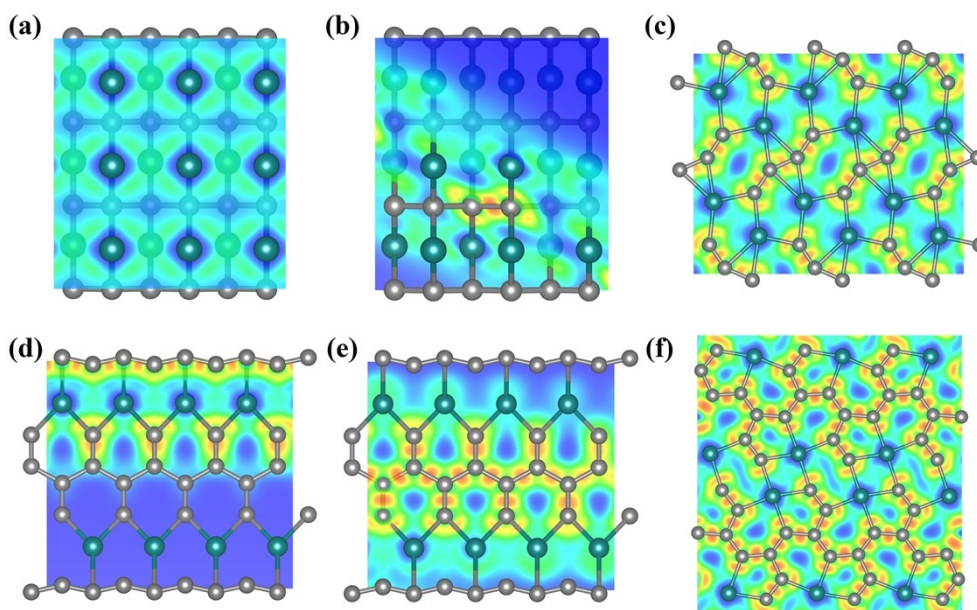

**Figure S5.** Electron localization function (ELF) map and crystal structures of the (a-b) PtC, (c) PtC<sub>2</sub>, (d-e) PtC<sub>3</sub>, and (f) PtC<sub>4</sub> monolayers. The indigo and gray balls represent Pt and C atoms, respectively.

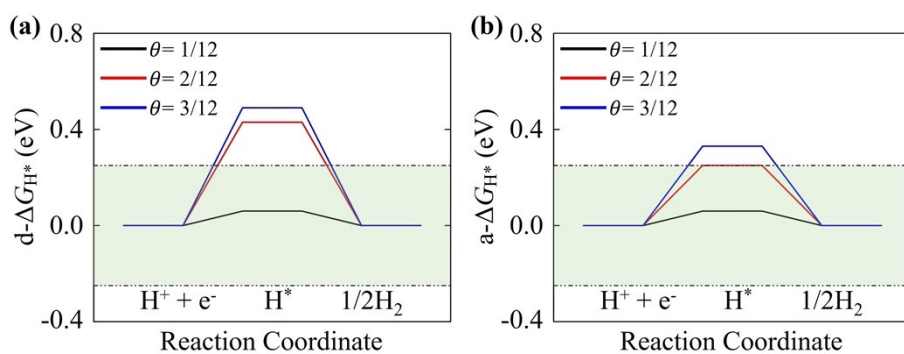

**Figure S6.** Calculated differential Gibbs free energies as a function of H coverage of the PtC<sub>4</sub> monolayers for H adsorbed on T<sub>C3</sub> site when pH = 0 at  $T = 300\text{K}$ . (a)  $d-\Delta G_{\text{H}^*}$  and (b)  $a-\Delta G_{\text{H}^*}$ . The highlighted in green denotes the free energy window of  $\pm 0.25\text{ eV}$ .



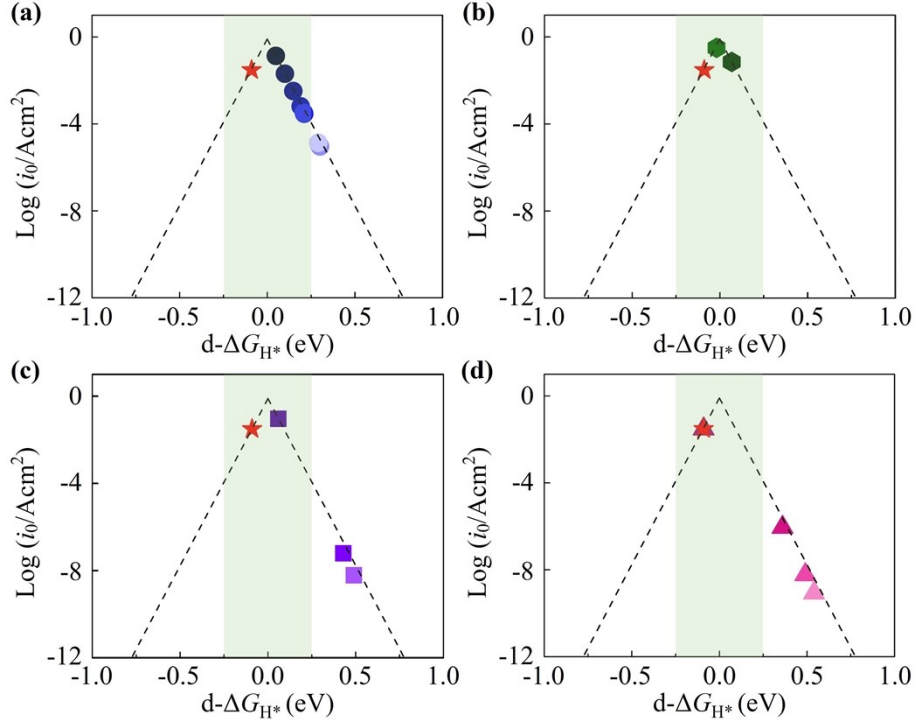

**Figure S7.** Volcano curve of exchange current density  $i_0$  of the (a) PtC, (b) PtC<sub>2</sub>, (c) T<sub>C3</sub> site, and (d) T<sub>Pt</sub> site of the PtC<sub>4</sub> monolayers as a function of  $d-\Delta G_{H^*}$  when pH = 0 at  $T = 300\text{K}$ . The value of Pt is inserted by a red star for comparison. The color changes from dark to light with increasing H coverage.

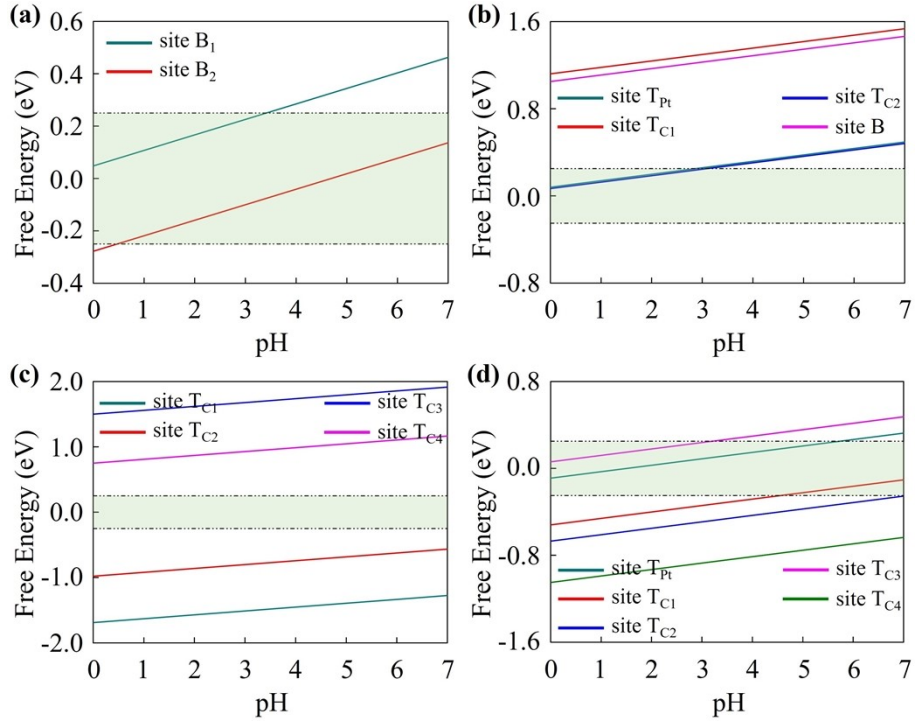

**Figure S8.** Free energy of Hydrogen adsorption as a function of the pH value for the (a) PtC, (b) PtC<sub>2</sub>, (c) PtC<sub>3</sub>, and (d) PtC<sub>4</sub> monolayers. A  $\pm 0.25$  eV window is indicated in green.

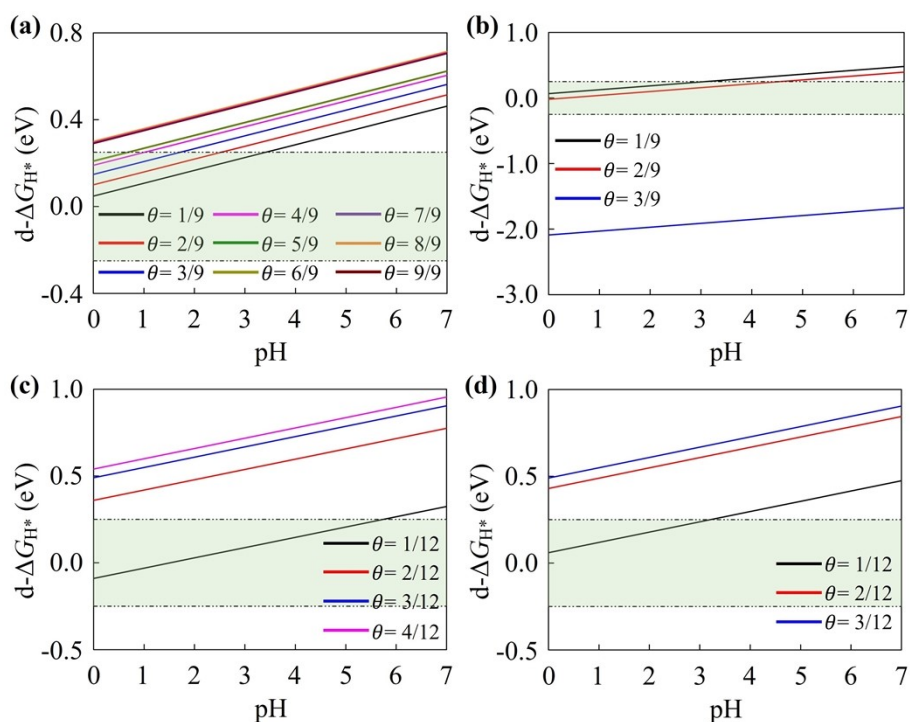

**Figure S9.**  $d-\Delta G_{H^*}$  as a function of the pH value for the (a) PtC, (b) PtC<sub>2</sub>, H adsorbed on (c) T<sub>Pt</sub> site and (d) T<sub>C3</sub> of PtC<sub>4</sub> monolayers. A  $\pm 0.25$  eV window is indicated in green.

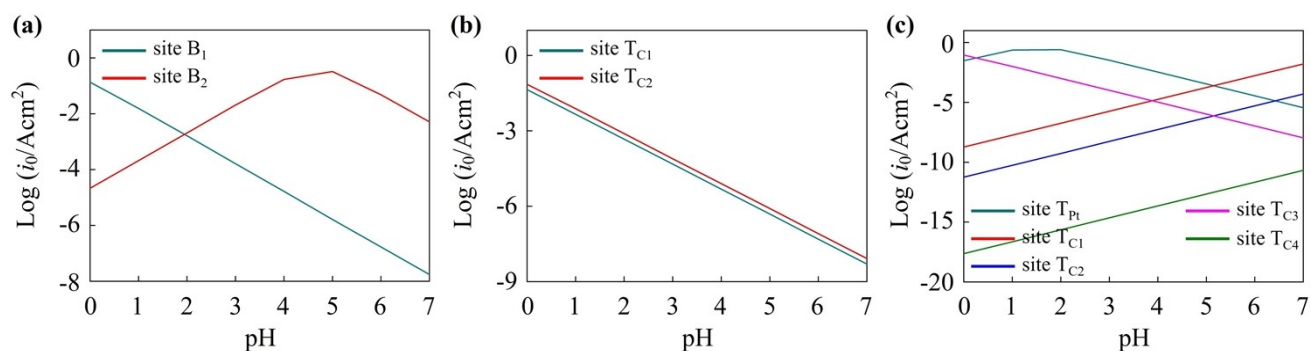

**Figure S10.** Exchange current density as a function of the pH value for the (a) PtC, (b) PtC<sub>2</sub>, and (c) PtC<sub>4</sub> monolayers for H adsorption sites.

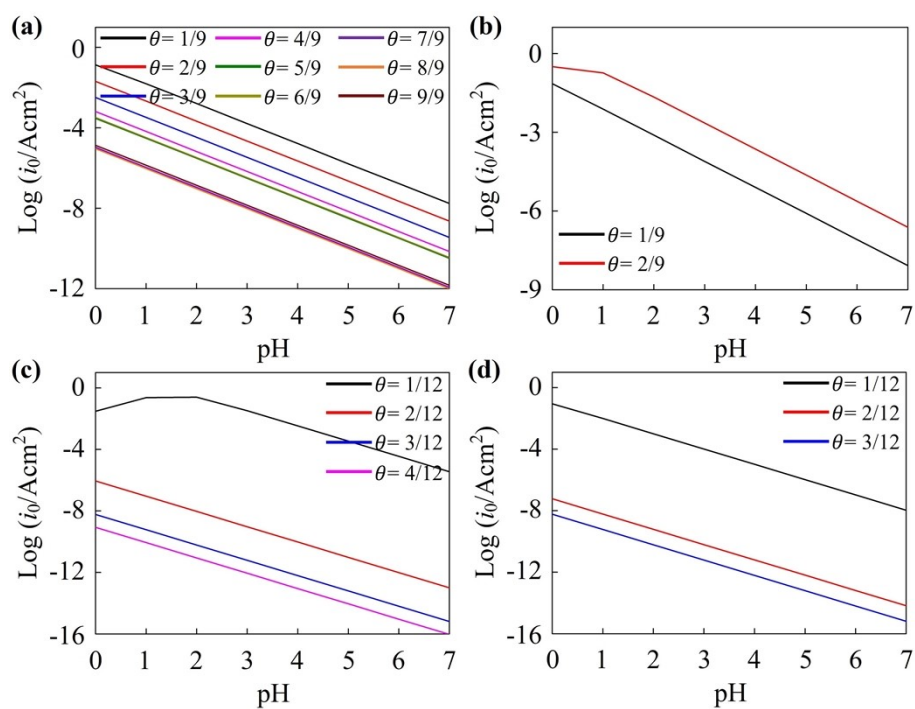

**Figure S11.** Exchange current density as a function of the pH value with various H coverage for the (a) PtC, (b) PtC<sub>2</sub>, H adsorbed on (c) T<sub>Pt</sub> site and (d) T<sub>C3</sub> of PtC<sub>4</sub> monolayers based on  $d\text{-}\Delta G_{\text{H}^*}$ .

## Supporting Tables

**Table S1.** Structural information of the predicted PtC<sub>x</sub> (x = 1-4) monolayers.

| Phase            | Space Group             | Lattice Parameters<br>(Å, °)             | Wyckoff Positions   | Fractional Coordinates |         |         |
|------------------|-------------------------|------------------------------------------|---------------------|------------------------|---------|---------|
|                  |                         |                                          |                     | x                      | y       | z       |
| PtC              | <i>P2<sub>1</sub>/m</i> | <i>a</i> = 22.25840                      | Pt(2e)              | 0.58453                | 0.75000 | 0.47651 |
|                  |                         | <i>b</i> = 2.58700                       | C(2e)               | 0.51699                | 0.75000 | 0.99528 |
|                  |                         | <i>c</i> = 2.79880                       |                     |                        |         |         |
|                  |                         | <i>α</i> = 90.0000                       |                     |                        |         |         |
|                  |                         | <i>β</i> = 87.9914<br><i>γ</i> = 90.0000 |                     |                        |         |         |
| PtC <sub>2</sub> | <i>Pbam</i>             | <i>a</i> = 4.29970                       | Pt(4h)              | 0.27718                | 0.82813 | 0.50000 |
|                  |                         | <i>b</i> = 10.52200                      | C <sub>1</sub> (4h) | 0.82317                | 0.86806 | 0.50000 |
|                  |                         | <i>c</i> = 30.00000                      | C <sub>2</sub> (4h) | 0.84773                | 0.47230 | 0.50000 |
|                  |                         | <i>α</i> = 90.0000                       |                     |                        |         |         |
|                  |                         | <i>β</i> = 90.0000<br><i>γ</i> = 90.0000 |                     |                        |         |         |
| PtC <sub>3</sub> | <i>Pma2</i>             | <i>a</i> = 2.61830                       | Pt(2c)              | 0.25000                | 0.81524 | 0.50426 |
|                  |                         | <i>b</i> = 9.69370                       | C <sub>1</sub> (2c) | 0.25000                | 0.46281 | 0.46835 |
|                  |                         | <i>c</i> = 21.18650                      | C <sub>2</sub> (2c) | 0.75000                | 0.67505 | 0.47780 |
|                  |                         | <i>α</i> = 90.0000                       | C <sub>3</sub> (2c) | 0.75000                | 0.98508 | 0.56060 |
|                  |                         | <i>β</i> = 90.0000<br><i>γ</i> = 90.0000 |                     |                        |         |         |
| PtC <sub>4</sub> | <i>Pbam</i>             | <i>a</i> = 14.73520                      | Pt(4h)              | 0.57598                | 0.85443 | 0.50000 |
|                  |                         | <i>b</i> = 4.65800                       | C <sub>1</sub> (4h) | 0.29214                | 0.99290 | 0.50000 |
|                  |                         | <i>c</i> = 29.75800                      | C <sub>2</sub> (4h) | 0.37368                | 0.54335 | 0.50000 |
|                  |                         | <i>α</i> = 90.0000                       | C <sub>3</sub> (4h) | 0.28489                | 0.67294 | 0.50000 |
|                  |                         | <i>β</i> = 90.0000<br><i>γ</i> = 90.0000 | C <sub>4</sub> (4h) | 0.44532                | 0.71920 | 0.50000 |

**Table S2.** Cohesive energy ( $E_{\text{coh}}$ ) of the predicted PtC<sub>x</sub> (x = 1-4) monolayers.

| Pt-C monolayer   | $E_{\text{coh}}$ (eV) |
|------------------|-----------------------|
| PtC              | 6.62                  |
| PtC <sub>2</sub> | 6.41                  |
| PtC <sub>3</sub> | 6.75                  |
| PtC <sub>4</sub> | 6.79                  |

**Table S3.** Mulliken charge ( $|e|$ ) analysis of the  $\text{PtC}_x$  ( $x = 1-4$ ) monolayers.

| Atom           | PtC                 |                                 | PtC <sub>2</sub>    |                                 | PtC <sub>3</sub>    |                                 | PtC <sub>4</sub>    |                                 |
|----------------|---------------------|---------------------------------|---------------------|---------------------------------|---------------------|---------------------------------|---------------------|---------------------------------|
|                | Charge<br>( $ e $ ) | $\Delta G_{\text{H}^*}$<br>(eV) | Charge<br>( $ e $ ) | $\Delta G_{\text{H}^*}$<br>(eV) | Charge<br>( $ e $ ) | $\Delta G_{\text{H}^*}$<br>(eV) | Charge<br>( $ e $ ) | $\Delta G_{\text{H}^*}$<br>(eV) |
| Pt             | 0.42                | B <sub>1</sub> (Pt-Pt)<br>0.05  | 1.03                | 1.05                            | 0.96                | -                               | 1.17                | -0.09                           |
| C <sub>1</sub> | -0.42               | B <sub>2</sub> (Pt-Pt)<br>-0.28 | -0.67               | 0.08                            | -0.52               | 0.75                            | -0.32               | -0.52                           |
| C <sub>2</sub> |                     |                                 | -0.36               | 0.06                            | -0.10               | 1.50                            | -0.34               | -0.67                           |
| C <sub>3</sub> |                     |                                 |                     | B(Pt-Pt)<br>1.12                | -0.68               | -0.98<br>-1.69                  | -0.01               | 0.06                            |
| C <sub>4</sub> |                     |                                 |                     |                                 |                     |                                 | -0.50               | -1.05                           |

**Table S4.** Calculated d- $\Delta G_{\text{H}^*}$  and a- $\Delta G_{\text{H}^*}$  (eV) varying different H atoms ( $n$ ) adsorbed on the  $\text{PtC}_x$  ( $x = 1-4$ ) monolayers.

| $n$<br>site | PtC            |      | PtC <sub>2</sub> |       | PtC <sub>3</sub> |      | PtC <sub>4</sub> |      |                 |       |
|-------------|----------------|------|------------------|-------|------------------|------|------------------|------|-----------------|-------|
|             | B <sub>1</sub> |      | T <sub>C2</sub>  |       | T <sub>C1</sub>  |      | T <sub>C3</sub>  |      | T <sub>Pt</sub> |       |
| 1           | 0.05           | 0.05 | 0.06             | 0.06  | 0.75             | 0.75 | 0.06             | 0.06 | -0.09           | -0.09 |
| 2           | 0.10           | 0.07 | -0.02            | -0.02 |                  |      | 0.43             | 0.25 | 0.36            | 0.13  |
| 3           | 0.15           | 0.10 | -2.09            | -0.07 |                  |      | 0.49             | 0.33 | 0.49            | 0.25  |
| 4           | 0.19           | 0.12 |                  |       |                  |      |                  |      | 0.54            | 0.33  |
| 5           | 0.21           | 0.14 |                  |       |                  |      |                  |      |                 |       |
| 6           | 0.21           | 0.15 |                  |       |                  |      |                  |      |                 |       |
| 7           | 0.29           | 0.17 |                  |       |                  |      |                  |      |                 |       |
| 8           | 0.30           | 0.19 |                  |       |                  |      |                  |      |                 |       |
| 9           | 0.29           | 0.20 |                  |       |                  |      |                  |      |                 |       |

## References

- 1 Y. Wang, J. Lv, L. Zhu and Y. Ma, CALYPSO: A method for Crystal Structure Prediction, *Comput. Phys. Commun.*, 2012, **183**, 2063–2070.
- 2 Y. Wang, J. Lv, L. Zhu and Y. Ma, Crystal Structure Prediction Via Particle-Swarm Optimization, *Phys. Rev. B.*, 2010, **82**, 094116.
- 3 G. Kresse and J. Furthmüller, Efficient Iterative Schemes for Ab Initio Total-Energy Calculations Using A Plane-Wave Basis Set, *Phys. Rev. B*, 1996, **54**, 11169–11186.
- 4 J. Y. Jung, J. H. Park, Y. J. Jeong, K. H. Yang, N. K. Choi, S. H. Kim and W. J. Kim, Self-Consistent Equations Including Exchange and Correlation Effects, *Phys. Rev.*, 1965, **140**, A1133–A1138.
- 5 J. P. Perdew, K. Burke and M. Ernzerhof, Generalized Gradient Approximation Made Simple, *Phys. Rev. Lett.*, 1996, **77**, 3865–3868.
- 6 S. Grimme, Accurate Description of Van Der Waals Complexes by Density Functional Theory Including Empirical Corrections, *J. Comput. Chem.*, 2004, **25**, 1463–1473.
- 7 G. J. Martyna, M. L. Klein and M. Tuckerman, Nosé-Hoover Chains: The Canonical Ensemble Via Continuous Dynamics, *J. Chem. Phys.*, 1992, **97**, 2635–2643.
- 8 Y. Shao, X. Shi and H. Pan, Electronic, Magnetic, and Catalytic Properties of Thermodynamically Stable Two-Dimensional Transition-Metal Phosphides, *Chem. Mater.*, 2017, **29**, 8892–8900.
- 9 B. Zhang, X. Fu, L. Song and X. Wu, Improving Hydrogen Evolution Reaction Performance by Combining Tungsten Carbide and Nitrogen-Doped Graphene: A First-Principles Study, *Carbon N. Y.*, 2021, **172**, 122–131.
